# Supplementary material for: A 7500-year paleotsunami record from the coastal sediment of Sri Lanka and Indian Ocean trans-basin tsunami history.
Source: Research Square preprint supplement (doi:10.21203/rs.3.rs-8757939/v1), 2026-02-12

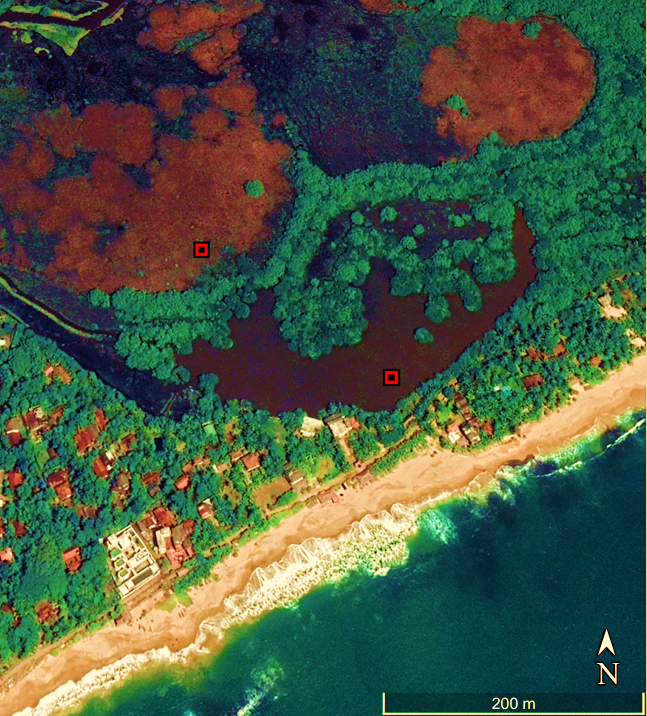


**TG (Pit)**

**TG 1**


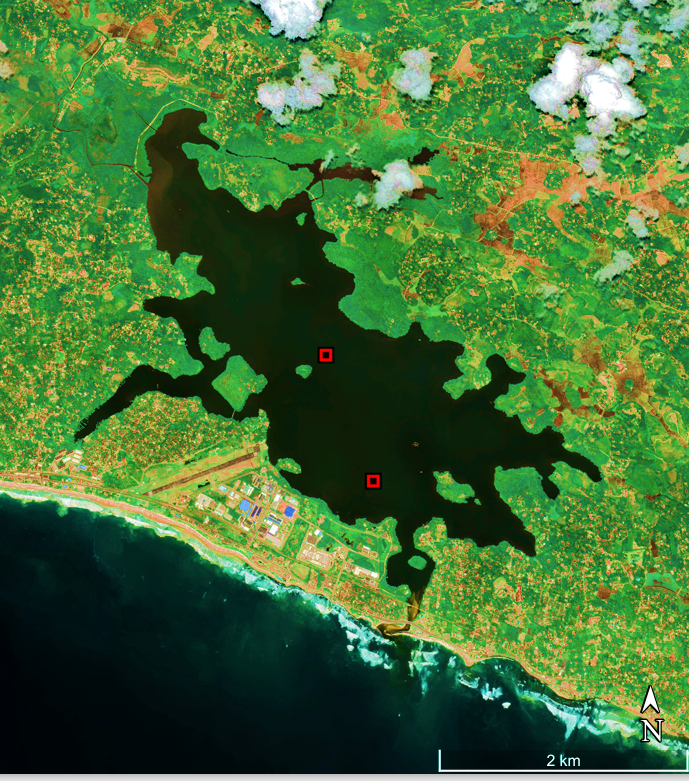

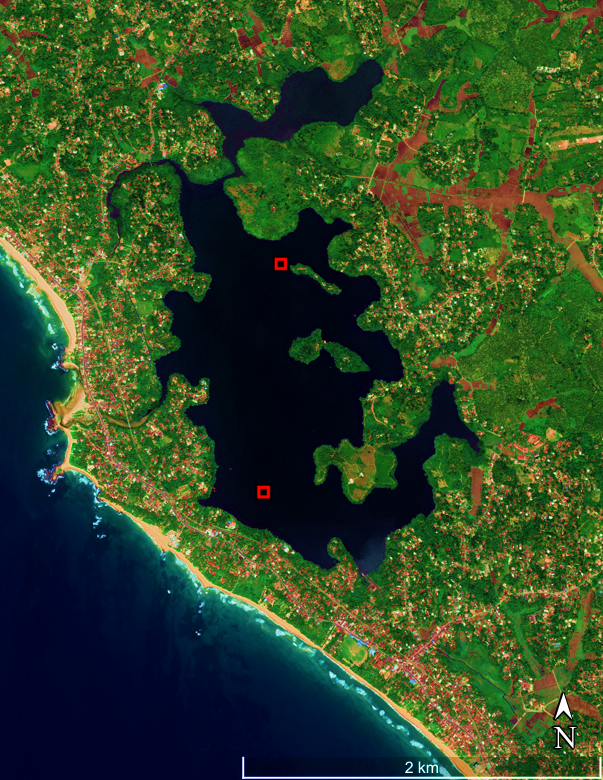


**KG2**

**KG1**

**RG2**

**RG1**


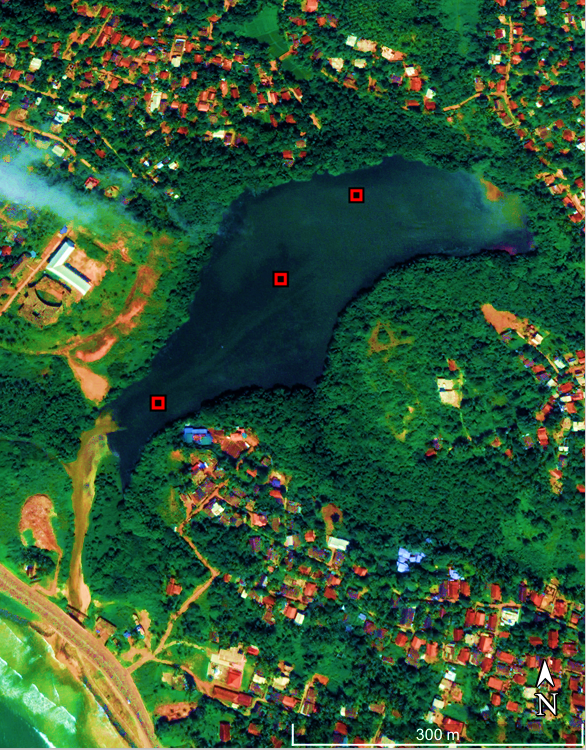


**DV1**

**DV2**

**DV3**


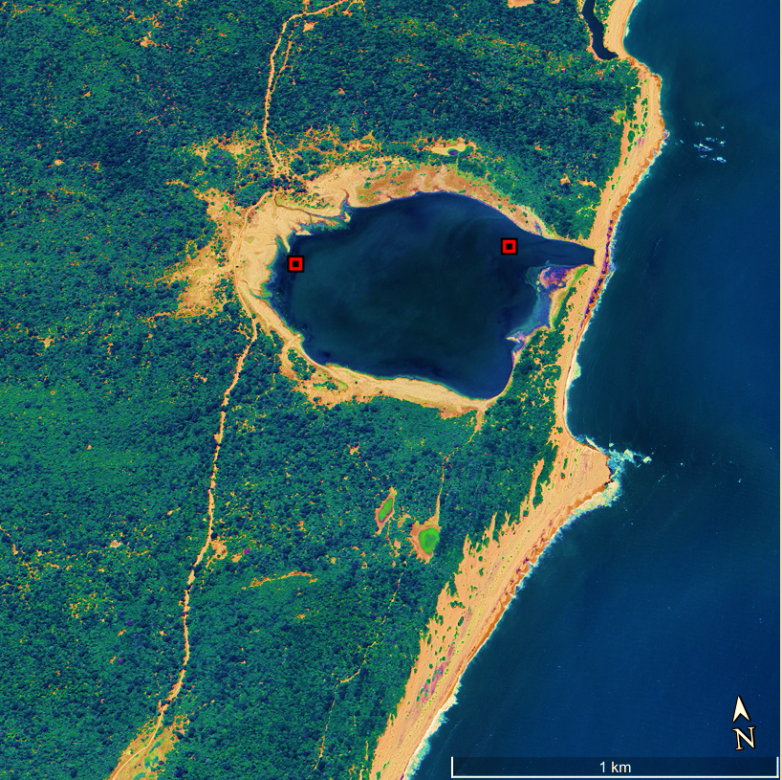


**KU51**

**KU11**


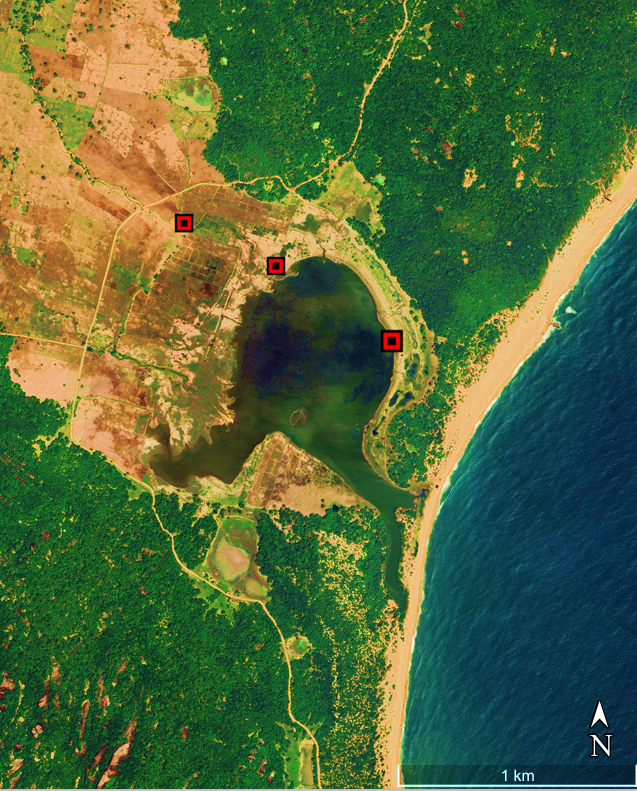


**OK11**

**OK21**

**OK31**


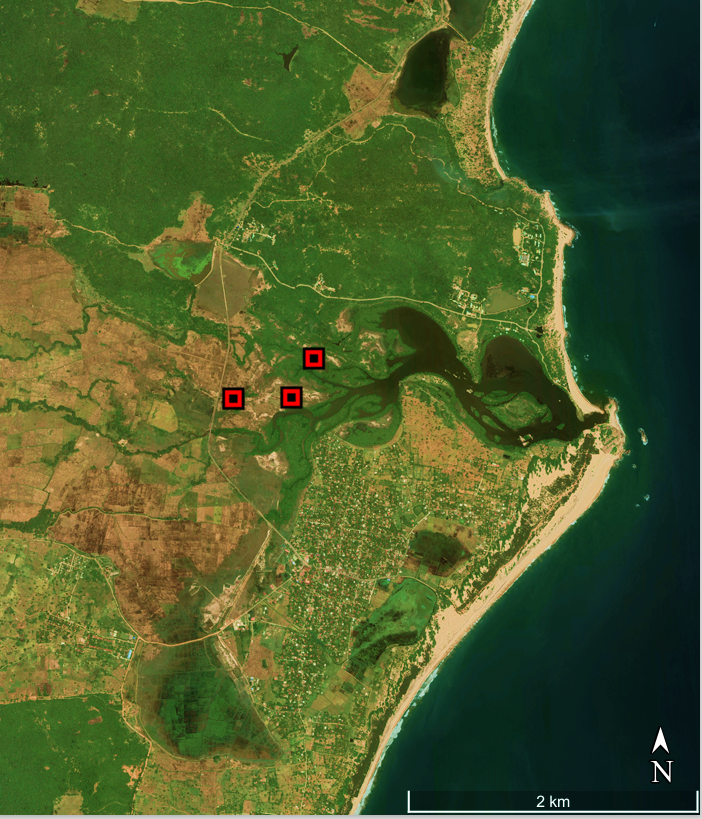


**PN1**

**PN2**

**PN3**


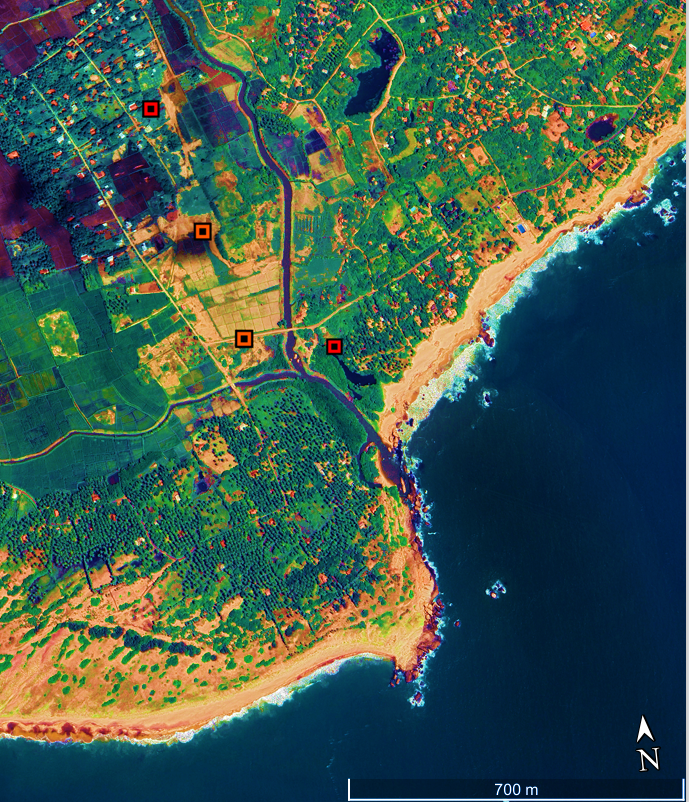


**KD31**

**KD21**

**KD11**

**KD41**


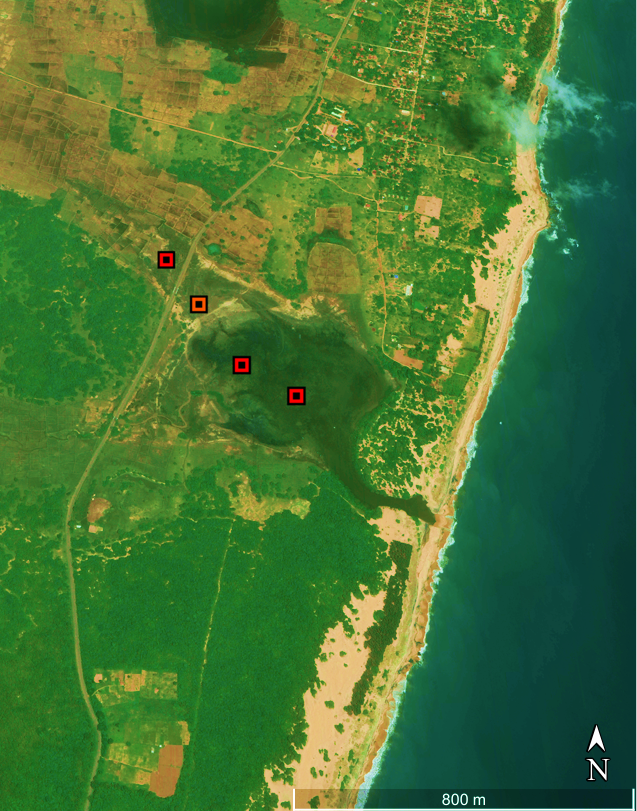


**KM1**

**KM2**

**KM3**

**KM4**


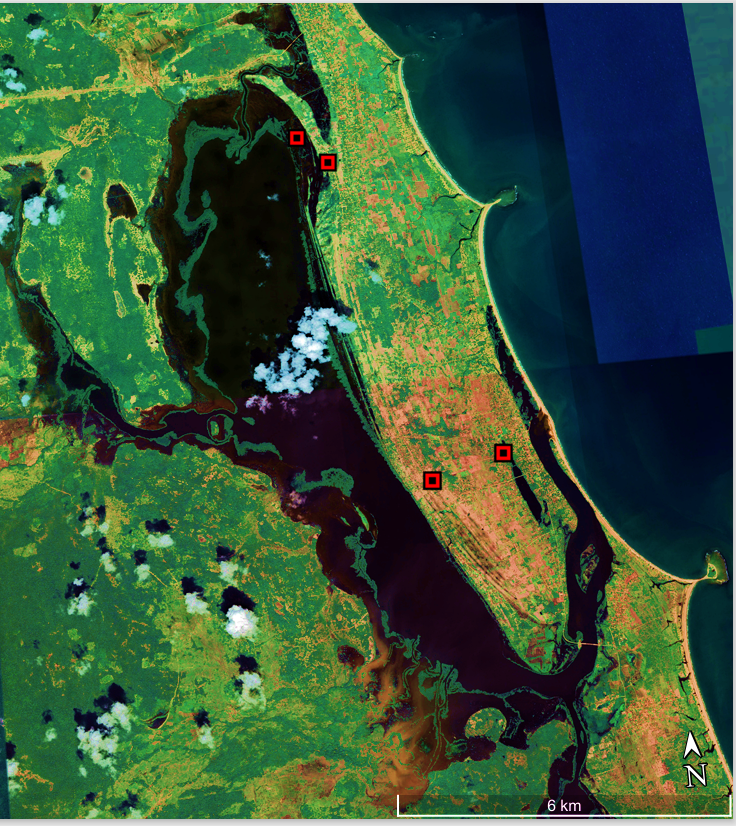


**V31**

**V32**

**V12**

**V13**

Figure Supplement 1 – Ten back barrier environments and their coring locations selected for the detailed sedimentological and geochemical analysis


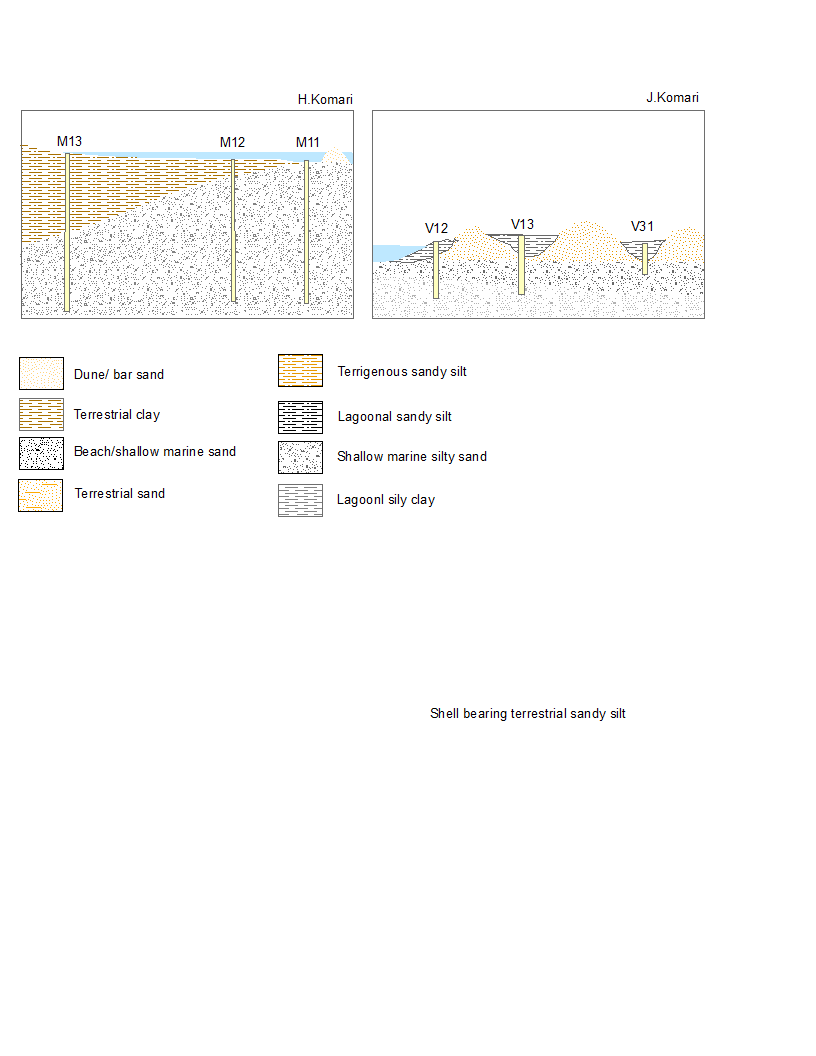


Figure Supplement 2 – Generalized stratigraphic profiles of the ten back barrier environments and their coring locations selected for the detailed sedimentological and geochemical analysis. Startigraphic profiles were contsructed based on the stratigraphyobserved in each core. Depths are not accoding to a scale.

A - Ratgama


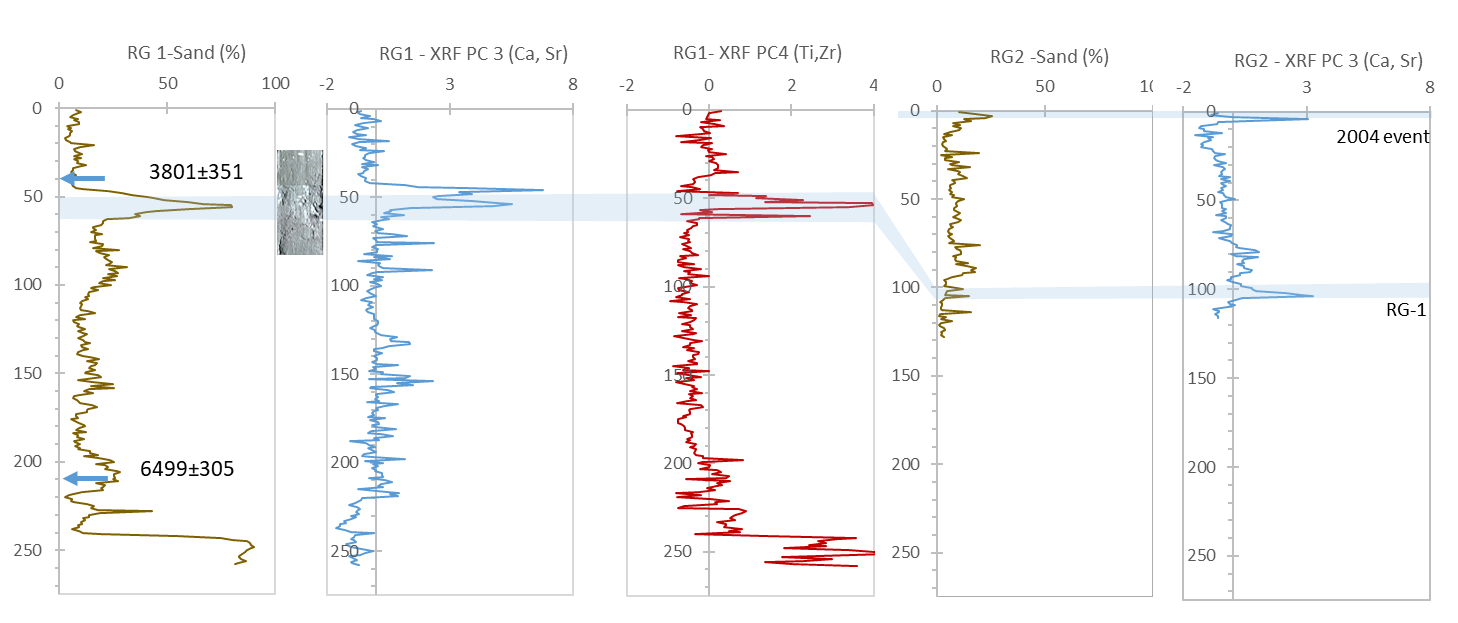


B - Koggala


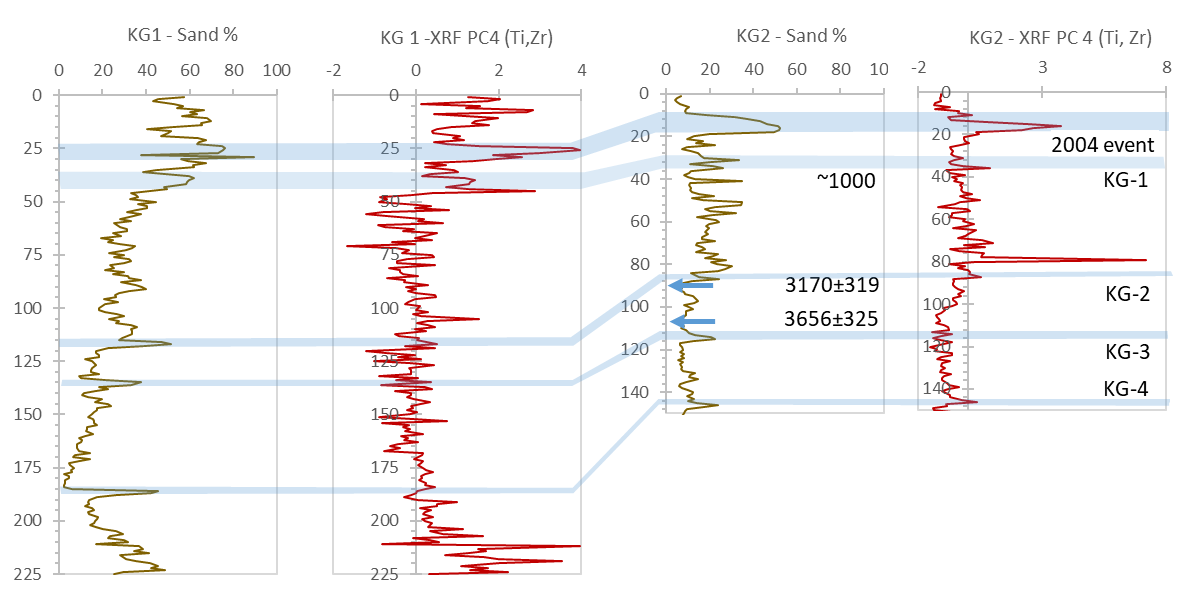


C - Devundara


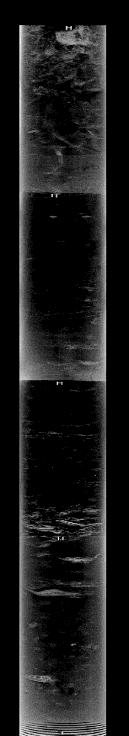


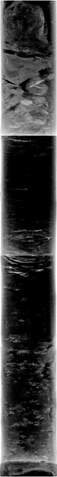


DV-5


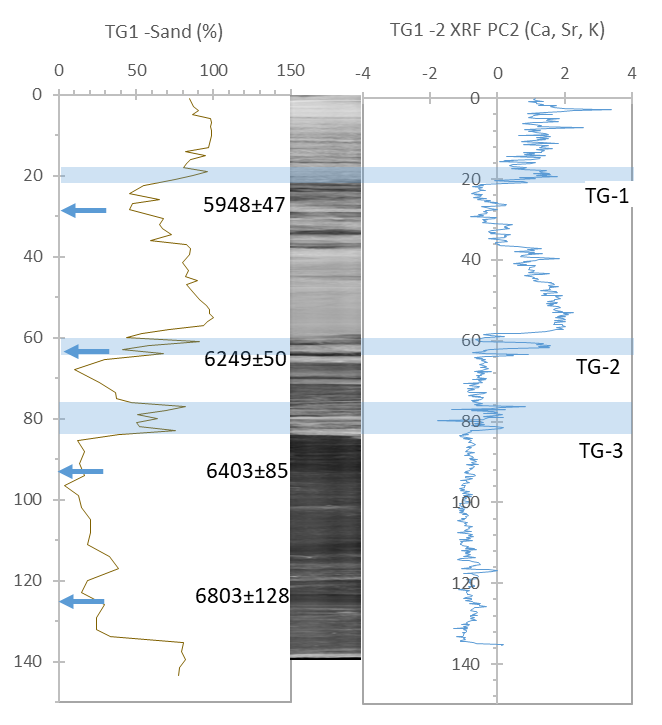
D - Tangalle


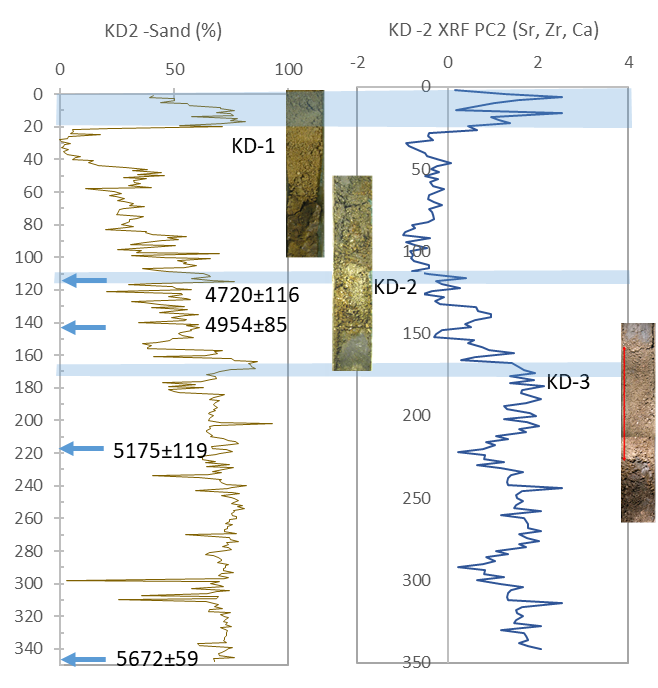
E -1 Kirinda

E-2 Kirinda


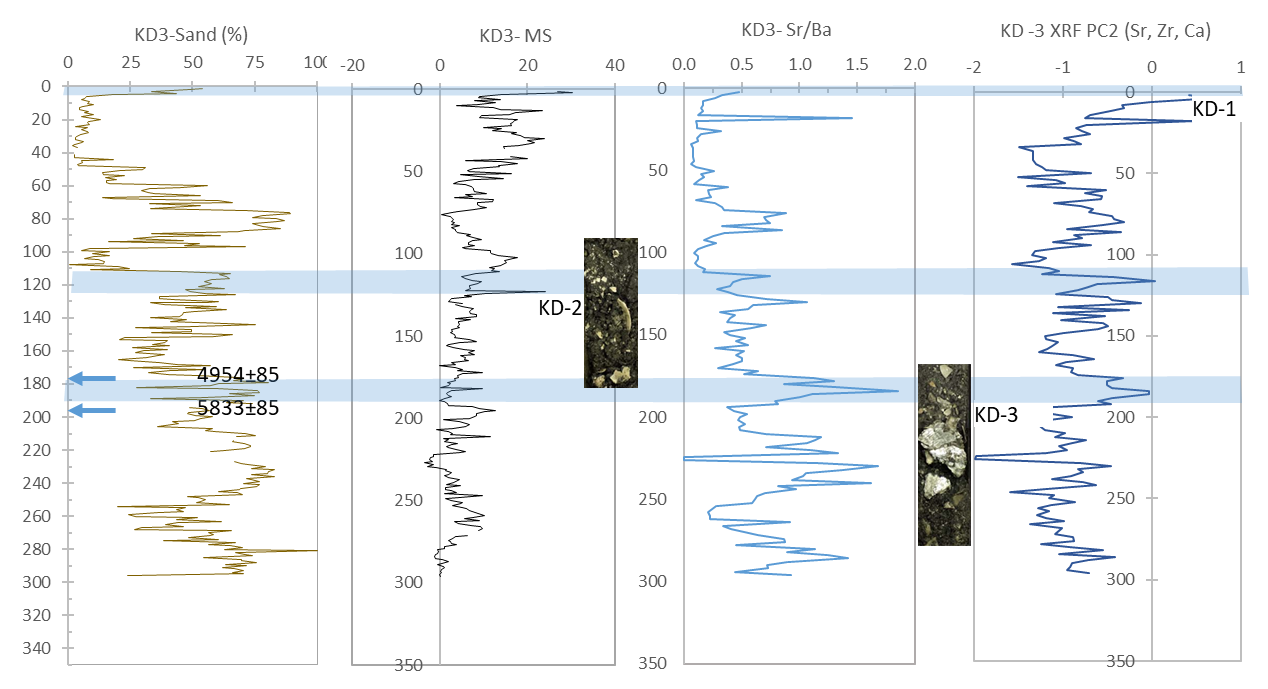


E-3 - Kirinda


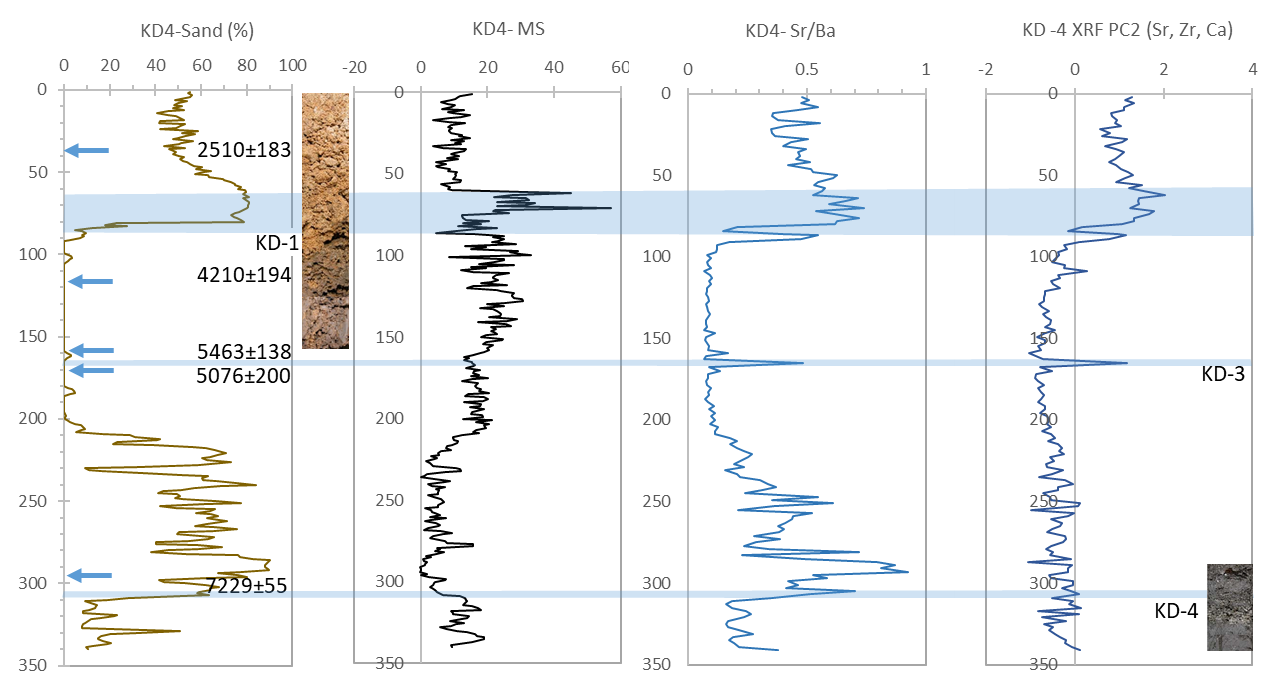


F - Kumana


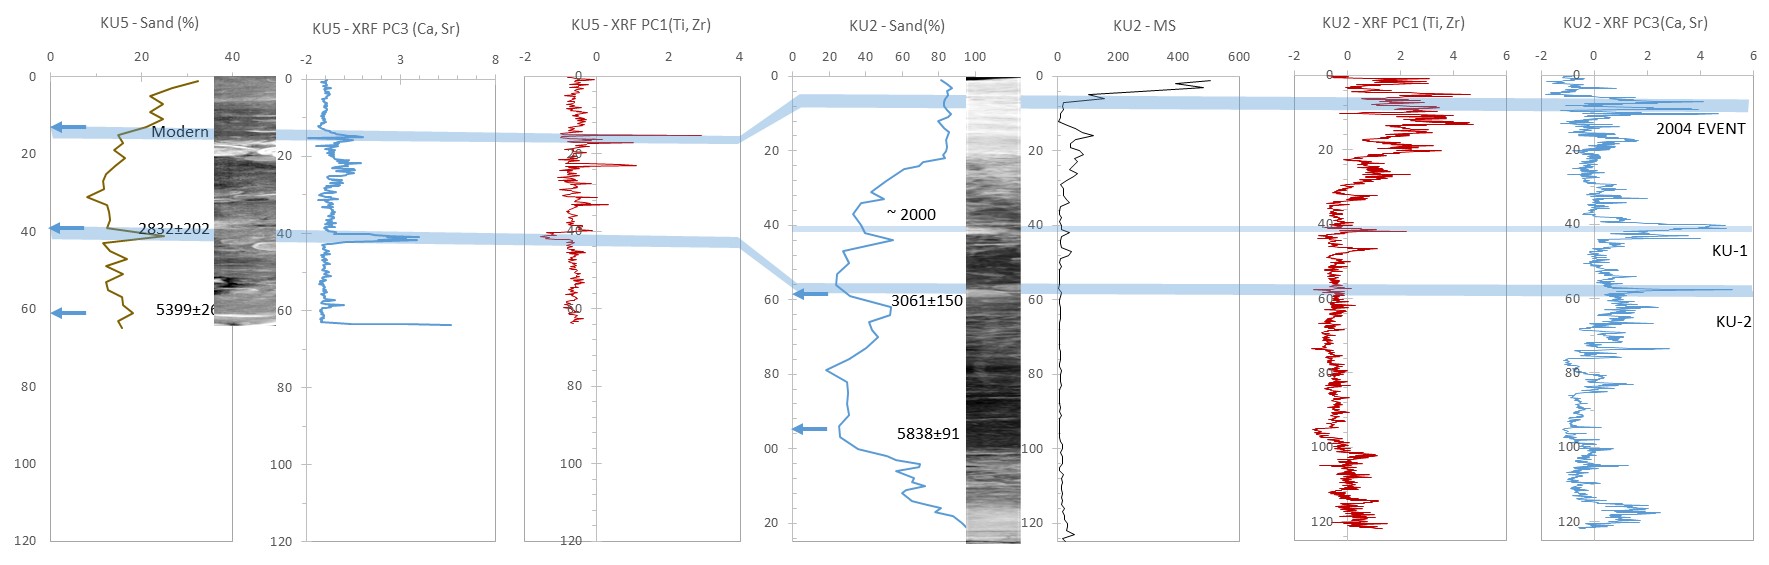


G - Okanda


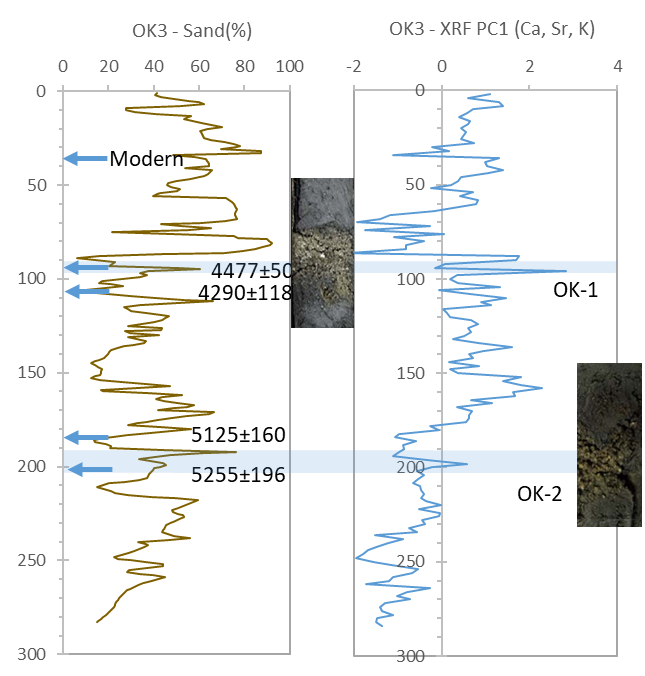


H – Panama


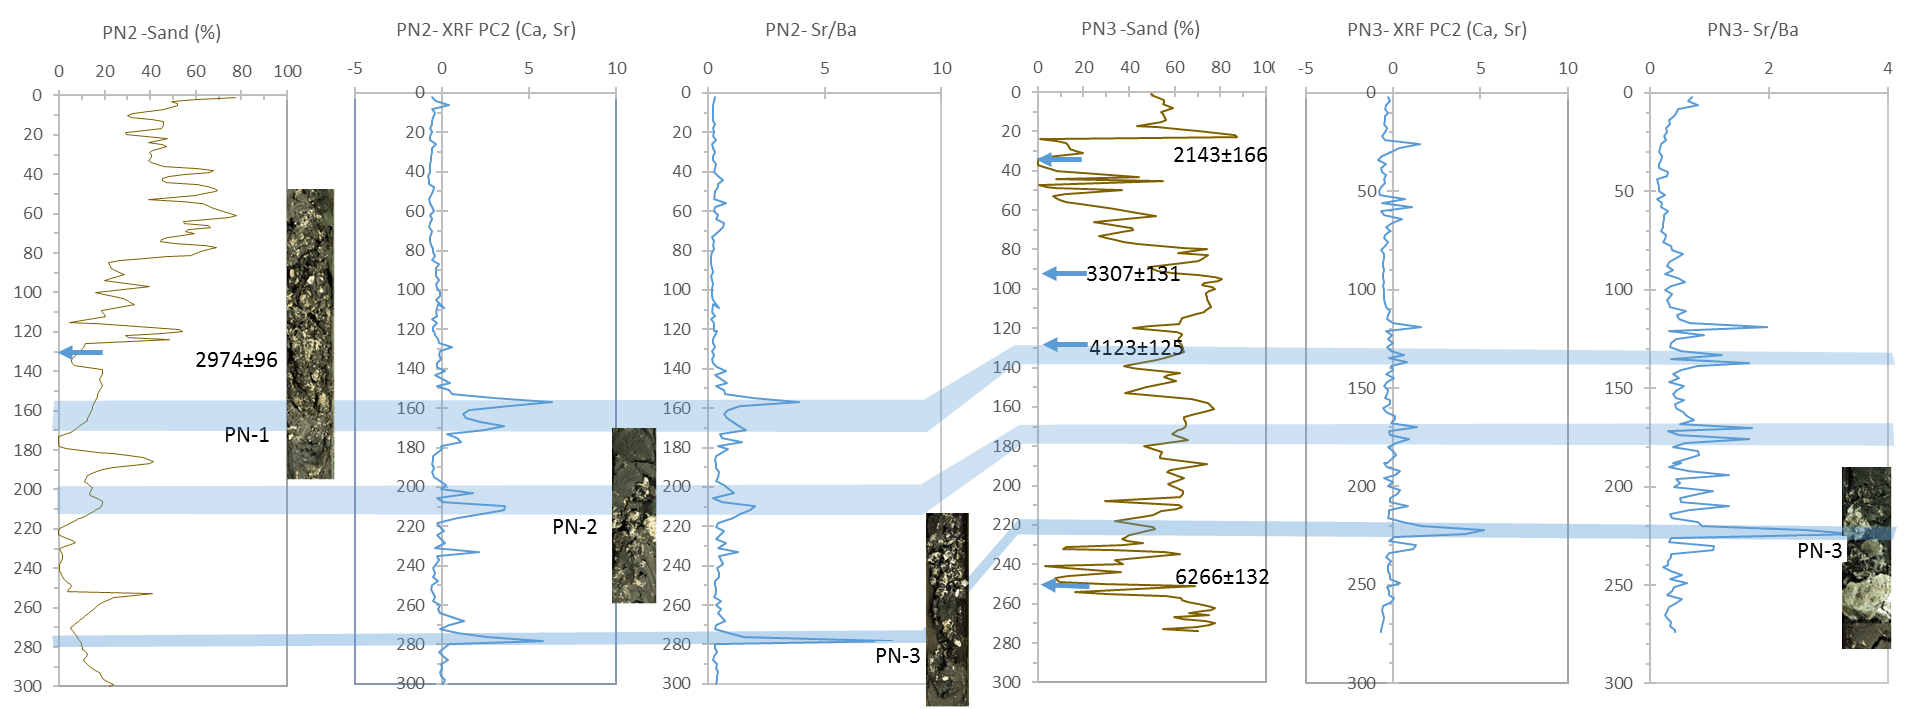


I
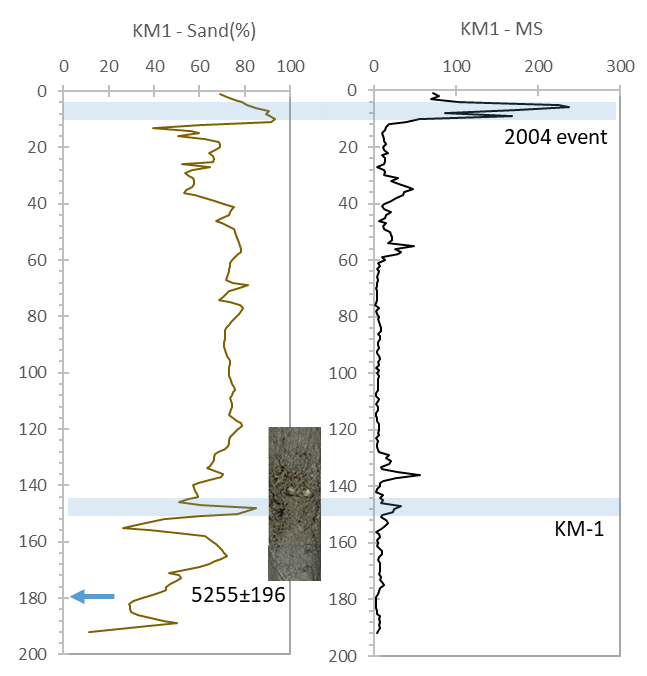
 - Komari

J - Vakarai


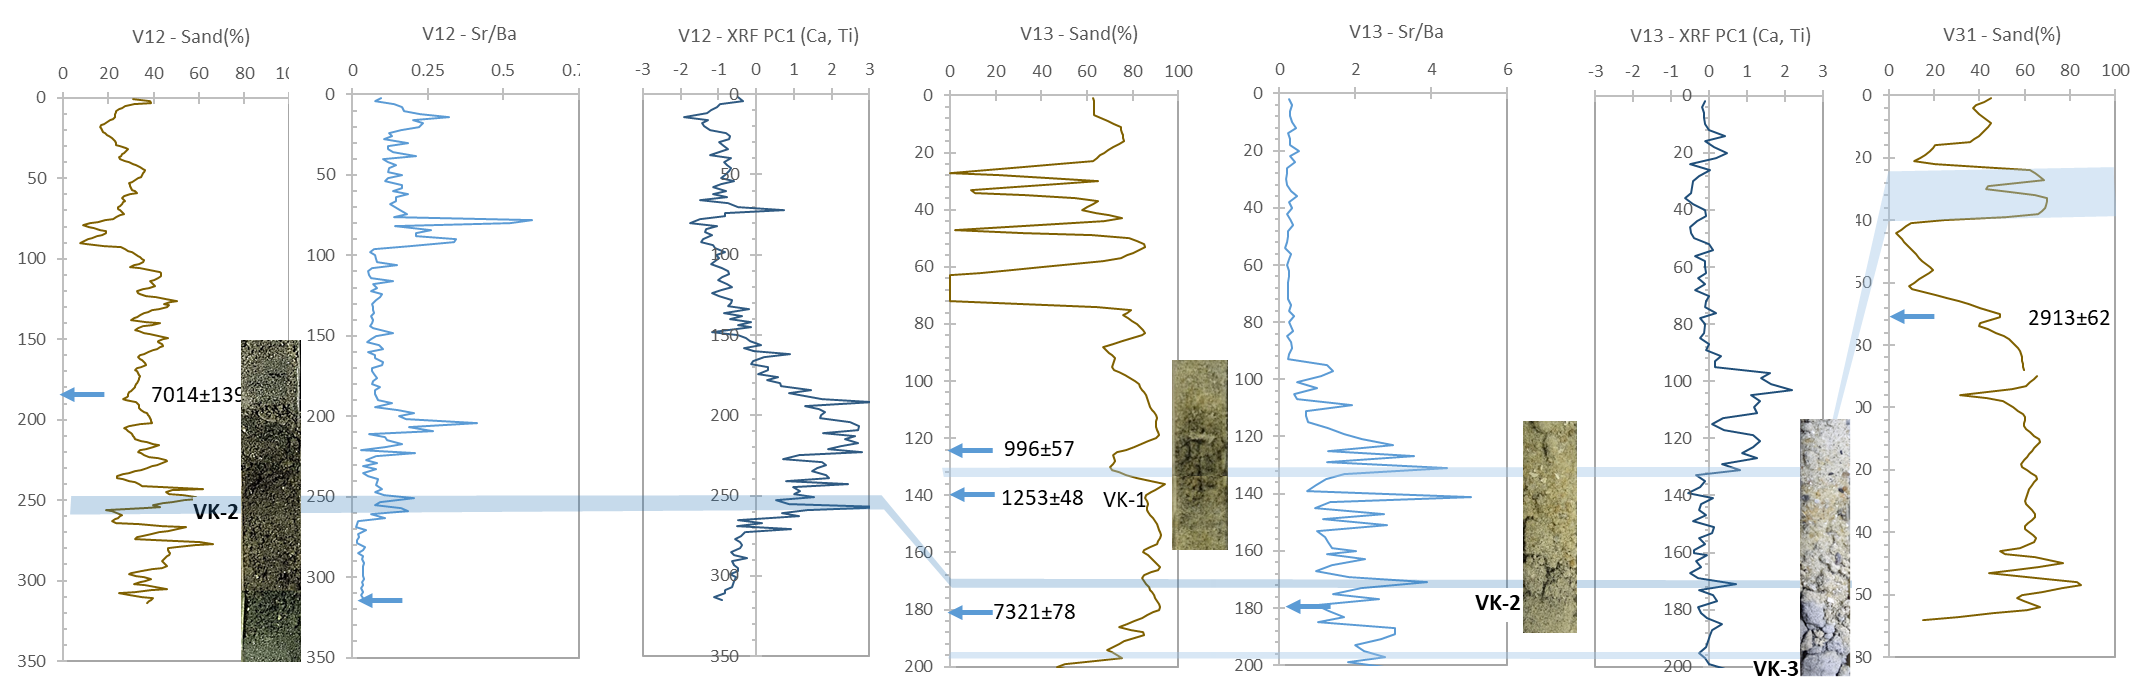


Figure Supplement 3 – Down core variation of proxy data at each site where abrupt marine event layers were recorded. Recognized layers are shaded. Radiocarbon ages are given and the depths are indicated using arrows. Event layers are labelled as per the text. Photographs of the event layers and available X-ray images of the cores are shown.

Figure supplement 4

A -Broken shell fragments in 2004 tsunami layer in Ratgama cores

B – Brocken shell fragments in ~ 4000 yrs BP tsunami sand layer

C - Foraminiferal species found in KD2-3 layer (~ 5100 yrs tsunami layer)


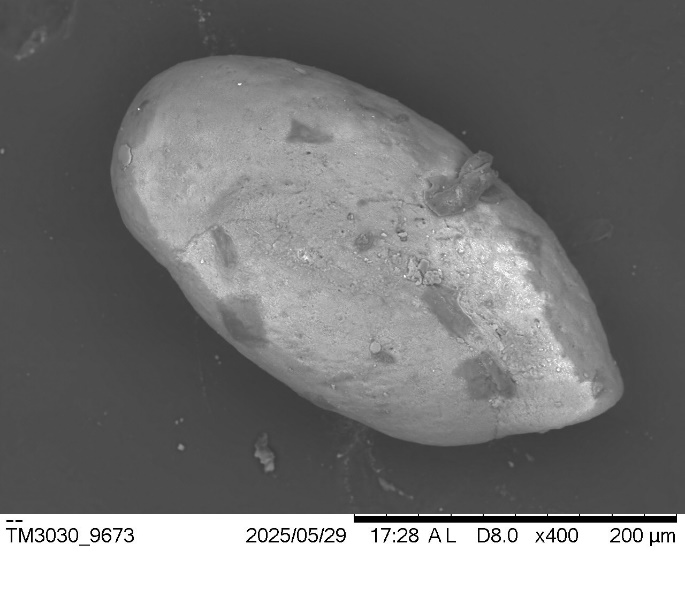

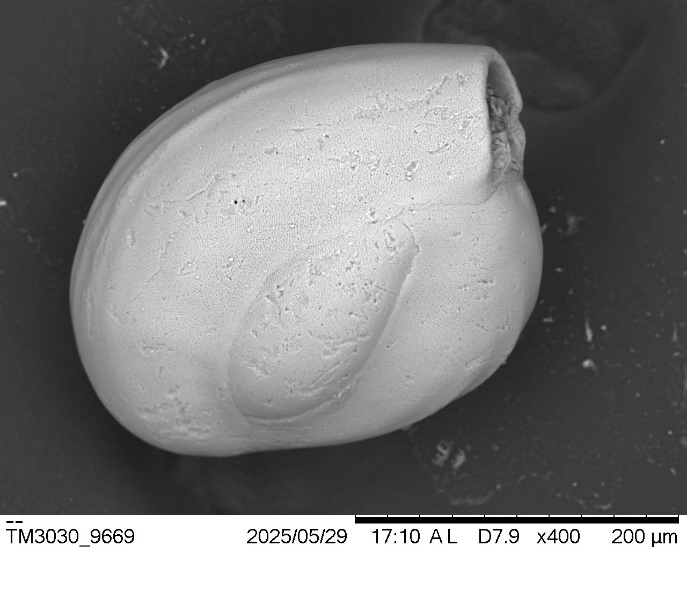

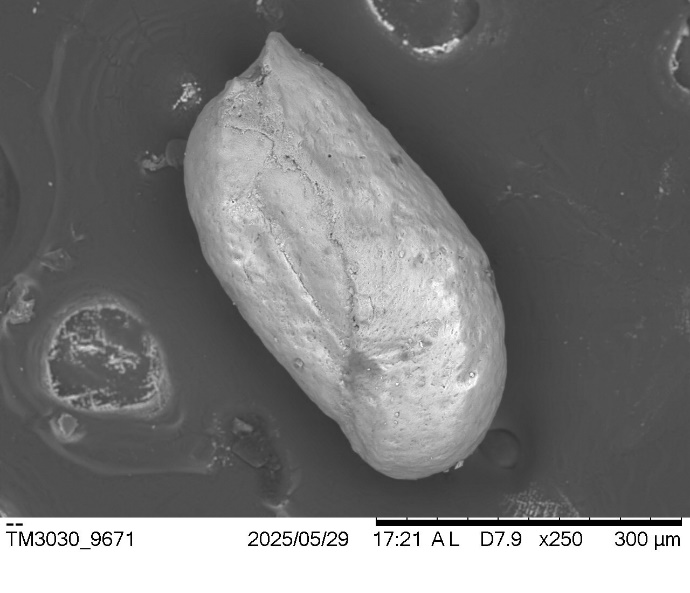

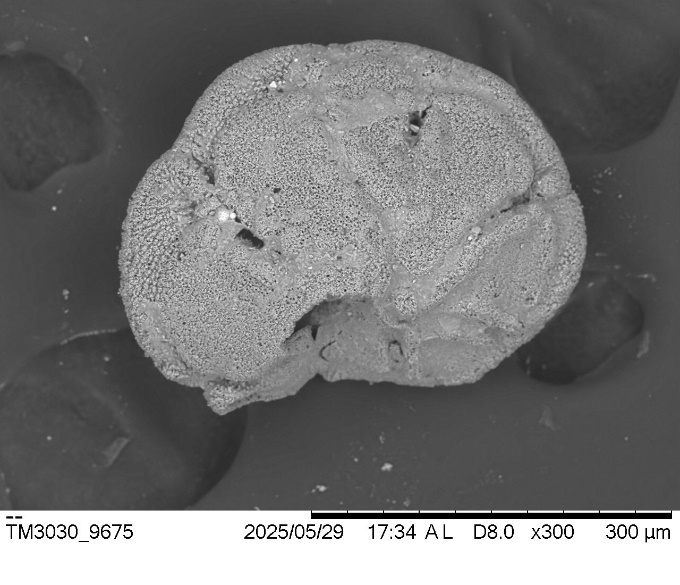

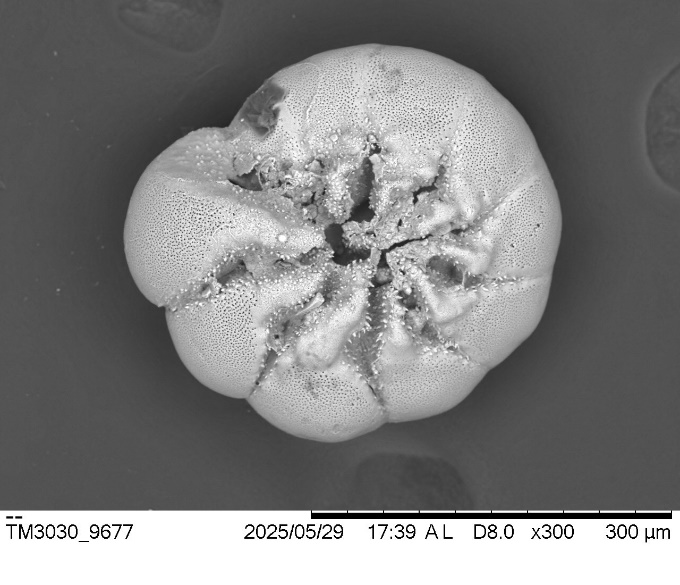


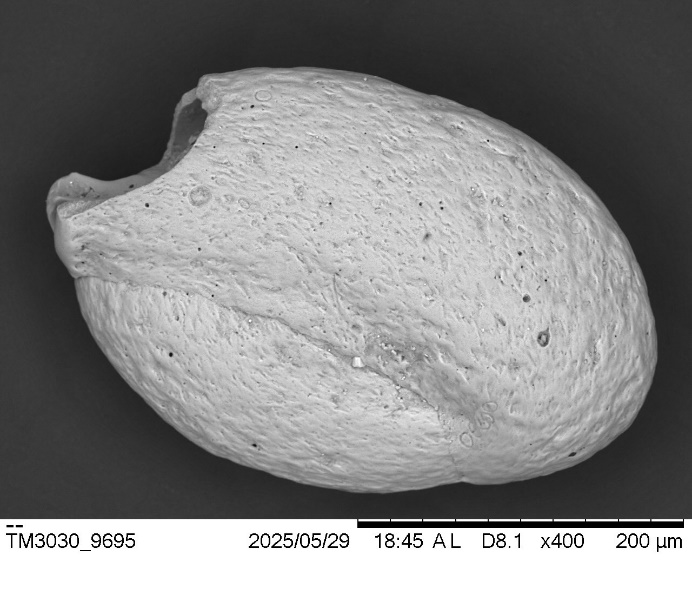
D - Foraminifera species in ~ 7300 yrs BP tsunami layer


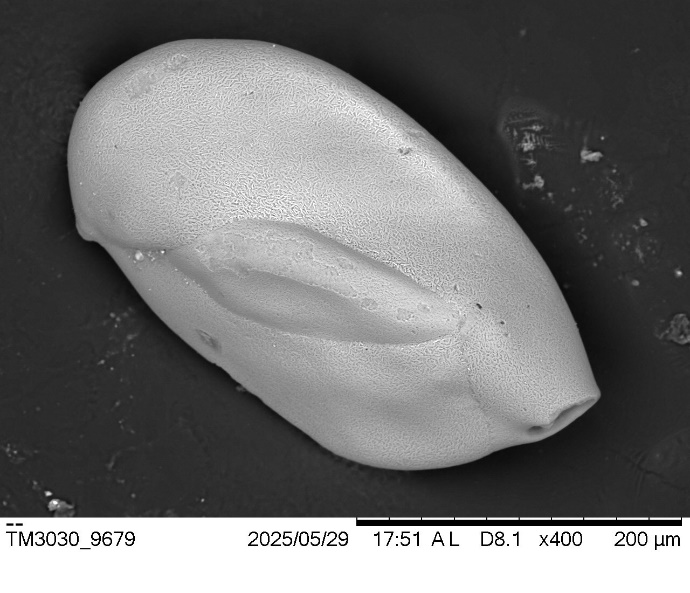

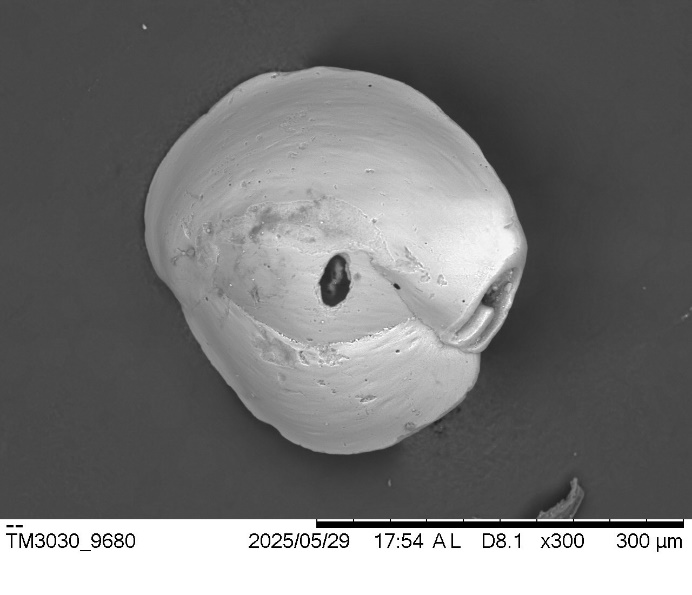

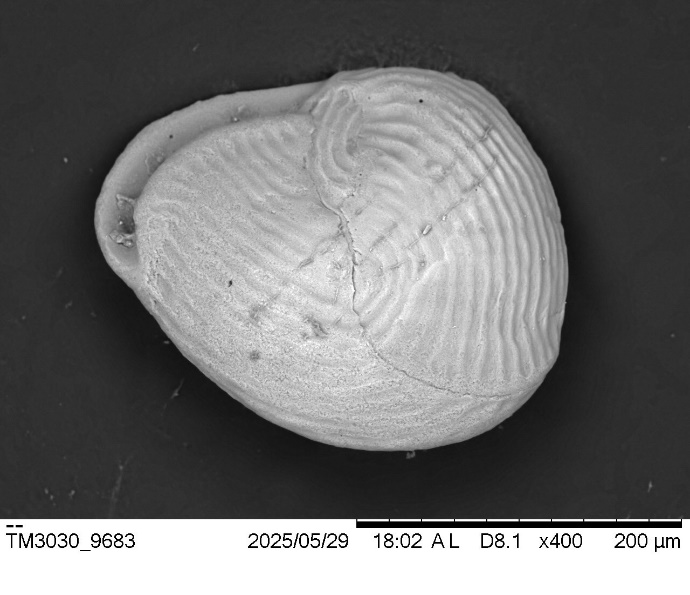

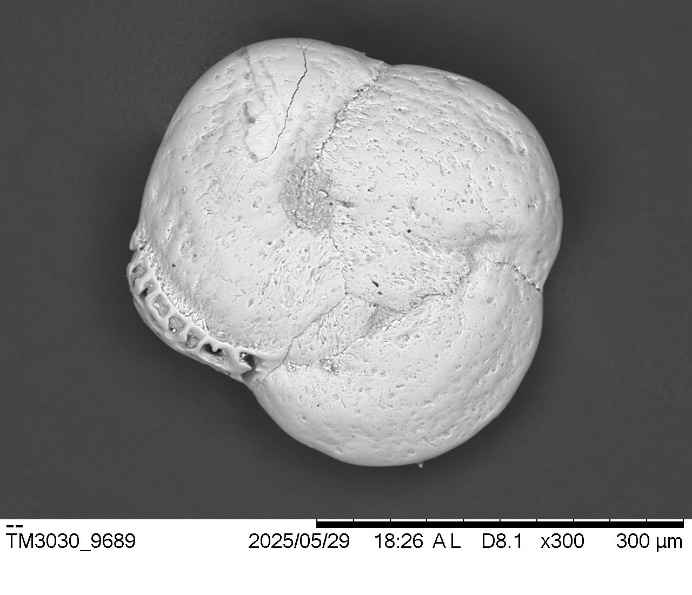

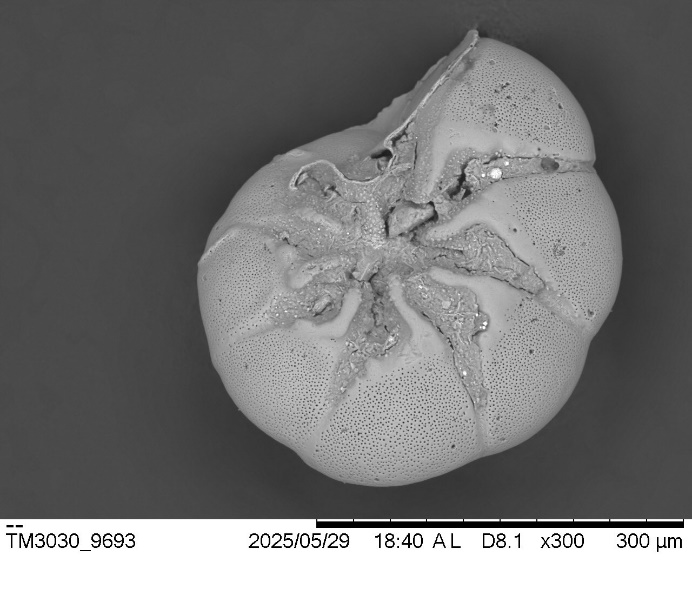

Supplement: Supplementary file 2 [file 803bad626e5a6f579092b834.docx]
