# Supplementary material for: A 7500-year paleotsunami record from the coastal sediment of Sri Lanka and Indian Ocean trans-basin tsunami history.
Source: Research Square preprint supplement (doi:10.21203/rs.3.rs-8757939/v1), 2026-02-12
Supplement: Supplementary file 1 [file 62e97b8cf096f99f089ac9b3.docx]

| Table Supplement 1 . Results of the AMS 14C analysis. Shaded dates were considered outliers relative to surrounding dates based on chronological order and ±2σ error. | | | | | | |
| --- | --- | --- | --- | --- | --- | --- |
| **Laboratory Ref No.** | **Sample no** | **Core Depth (cm)** | **Type** | **δ13C** | **14C yrs BP** | **Cal age yrs BP ± 2σ** |
| 1. OS-116611 | RG/01/40 | 40 | Mollusc | - | 3510±140 | 3450-4153 |
| 1. OS-116612 | RG/01/210 | 210 | Mollusc | - | 5690±150 | 6194-6804 |
| 1. OS-116613 | KG/02/115 | 115 | Mollusc | - | 3370±140 | 3331-3981 |
| 1. OS-116614 | KG/02/90 | 90 | Mollusc | - | 3040±140 | 2851-3489 |
| 1. OS-116615 | D1 38-39 | 38-39 | Mollusc | - | 2930±140 | 2769-3386 |
| 1. OS-116616 | D2 58 | 58 | Mollusc | - | 3730±140 | 3698-4440 |
| 1. OS-116617 | D3 99 | 99 | Mollusc | - | 4090±140 | 4221-4884 |
| 1. OS-116618 | D4 114 | 114 | Mollusc | - | 4830±140 | 5283-5912 |
| 1. OS-94191 | TG11132 | 32 | Sediment Organic carbon | -25 | 6560±40 | 7422-7567 |
| 1. OS-94402 | TG11165 | 65 | Sediment Organic carbon | -25- | 6630±25 | 7466-7571 |
| 1. OS-94404 | TG111132 | 132 | Sediment Organic carbon | -25.19- | 7970±55 | 8646-8997 |
| 1. OS-96440 | TG11129 | 29 | Mollusc | -6.19 | 5180±30 | 5901-5996 |
| 1. OS-96446 | TG11164 | 64 | Mollusc | -5.34 | 5450±30 | 6199-6300 |
| 1. OS-96437 | TG11194 | 94 | Mollusc | -4.45 | 5640±25 | 6342-6489 |
| 1. OS-96449 | TG111125 | 125 | Mollusc | -6.26 | 5970±40 | 6675-6899 |
| 1. OS-80329 | K112 75-76 | 91-92 | Sediment Organic carbon | -17.74 | 4690±45 | 5313-5572 |
| 1. OS-77588 | K121 30 | 30 | Sediment Organic carbon | -16.73 | 4330±35 | 4839-4974 |
| 1. OS-77589 | K122 37-38 | 117 | Sediment Organic carbon | -21.84 | 4180±35 | 4604-4836 |
| 1. OS-77878 | K122 63 | 143 | Mollusc | -4.47 | 4390±30 | 4869-5039 |
| 1. OS-77879 | K123 27 | 174 | Sediment Organic carbon | -27.68 | 3020±25 | 3145-3333 |
| 1. OS-77969 | K123 56 | 203 | Mollusc | -3.83 | 4800±30 | 5475-5598 |
| 1. OS-77643 | K124 14 | 219 | Mollusc | -4.46 | 4510±30 | 5056-5295 |
| 1. OS-77644 | K125 65 | 345 | Mollusc | -5.17 | 4950±30 | 5613-5731 |
| 1. OS-80325 | K131 23-24 | 23-24 | Sediment Organic carbon | -17.24 | 6080±40 | 6801-7151 |
| 1. OS-77749 | K133 72 | 192 | Mollusc | -3.82 | 5100±35 | 5749-5918 |
| 1. OS-77750 | K133 55 | 174 | Mollusc | -1.09 | 4390±30 | 4869-5039 |
| 1. OS-78308 | K141 38 | 38 | Sediment Organic carbon | -15.11 | 2380±45 | 2327-2694 |
| 1. OS-77645 | K141 85 | 85 | Sediment Organic carbon | -16.94 | 3810±50 | 4015-4403 |
| 1. OS-78309 | K142 78 | 160 | Sediment Organic carbon | -17.87 | 4760±55 | 5325-5600 |
| 1. OS-78279 | K143 9 | 167 | Sediment Organic carbon | -17.87 | 4430±35 | 4876-5275 |
| 1. OS-78310 | K143 75 | 233 | Sediment Organic carbon | -22.65 | 3800±30 | 4087-4277 |
| 1. OS-78311 | K144 62 | 296 | Sediment Organic carbon | -27.15 | 6300±30 | 7174-7282 |
| 1. OS-80198 | K144 76-77 | 310-311 | Sediment Organic carbon | 24.85 | 4240±30 | 4652-4865 |
| 1. OS-77969 | K145 66 | - | Plant/wood | 26.48 | 3860±25 | 4172-4401 |
| 1. OS-78312 | K145 82 | 323 | Sediment Organic carbon | -24.99 | 4080±30 | 4444-4802 |
| 1. OS-96510 | KU 151-4 | 4 | Mollusc | -3.15 | Modern | n.a |
| 1. OS-96513 | KU151 37 | 37 | Mollusc | -1.16 | 3280±25 | 3450-3563 |
| 1. OS-94387 | KU151 38 | 38 | Mollusc | 0.49 | 3530±30 | 3039-3499 |
| 1. OS-104594 | KU151 63 | 63 | Mollusc |  | 4741±101 | 4494-5220 |
| 1. OS-96511 | KU121-28 | 28 | Mollusc | -0.86 | 3810±35 | 3387-3858 |
| 1. OS-104593 | KU121-59 | 59 | Mollusc |  | 2898±97 | 2784-3332 |
| 1. OS-94405 | KU121-98 | 98 | Sediment Organic carbon | -17.96 | 5110±35 | 5747-5930-+ |
| 1. OS-104599 | KU121-115 | 115 | Mollusc |  | 3823±100 | 3926-4517 |
| 1. OS-77751 | OK113 46 | 197 | Mollusc | 0.84 | 3540±25 | 3722-3894 |
| 1. OS-78059 | OK131 34-35 | 34-35 | Sediment Organic carbon | -17.07 | Modern | n.a. |
| 1. OS-78313 | OK131 68 | 68 | Sediment Organic carbon | -19.22 | 4170±35 | 4594-4832 |
| 1. OS-77647 | OK132 67 | 93 | Sediment Organic carbon | -20.25 | 4010±30 | 4418-4537 |
| 1. OS-78286 | OK132 80 | 107 | Sediment Organic carbon | -19.55 | 3870±35 | 4172-4409 |
| 1. OS-78314 | OK134 25 | 183 | Sediment Organic carbon | -19.56 | 4460±35 | 4965-5285 |
| 1. OS-78315 | OK134 42 | 200 | Sediment Organic carbon | -19.86 | 4580±40 | 5059-5452 |
| 1. OS-77648 | OK135 85 | 283 | Sediment Organic carbon | -20 | 4510±35 | 5050-5300 |
| 1. OS-80323 | P123 31-32 | 130-131 | Sediment Organic carbon | -20.95 | 2860±30 | 2878-3070 |
| 1. OS-80283 | P124 52-53 | 215-216 | Sediment Organic carbon | -21.54 | 6210±40 | 7001-7240 |
|  |  |  |  |  |  |  |
| Continued. |  |  |  |  |  |  |
| **Laboratory Ref No.** | **Sample no** | **Core Depth (cm)** | **Type** | **δ13C** | **14C yrs BP** | **Cal age yrs BP ± 2σ** |
| 1. OS-80328 | P125 24-25 | 238-259 | Sediment Organic carbon | -21.34 | 2780±45 | 2775-2980 |
| 1. OS-86425 | PI31 33-34 | 33-34 | Sediment Organic Carbon | -15.96 | 2130±60 | 1977-2315 |
| 1. OS-80327 | P131 72-73 | 72-73 | Sediment Organic Carbon | -21.36 | 5980±55 | 6685-6950 |
| 1. OS-86424 | P132 23-24 | 91-92 | Sediment Organic Carbon | -19.87 | 3100±55 | 3176-3438 |
| 1. OS-86475 | P133 39-40 | 128-129 | Sediment Organic Carbon | -20.59 | 3770±35 | 3998-4249 |
| 1. OS-80327 | P134 72-73 | 222-223 | Sediment Organic carbon | -21.36 | 5980±55 | 6685-6949 |
| 1. OS-86470 | P135 41-42 | 250-251 | Sediment Organic Carbon | -21.74 | 5480±35 | 6201-6331 |
| 1. OS-80284 | M114 20 | 180 | Sediment Organic carbon | -20.24 | 4610±50 | 5062-5471 |
| 1. OS-77752 | V311 71 | 71 | Mollusc | -8.43 | 2810±25 | 2851-2976 |
| 1. OS-80087 | V123 75-76 | 187-188 | Mollusc | -3.77 | 6100±35 | 6875-7153 |
| 1. OS-80088 | V132 61-62 | 122-123 | Sediment Inorganic Carbon | -10.65 | 1080±30 | 939-1054 |
| 1. OS-80081 | V132 79-80 | 140-141 | Sediment Inorganic Carbon | -10.05 | 1330±20 | 1205-1302 |
| 1. OS-80080 | V133 82-83 | 181-182 | Mollusc | -4.87 | 6360±25 | 7243-7400 |
